# Supplementary material
Source: publisher figshare collection journal article supplement (https://gsajournals.figshare.com/ndownloader/files/26606798)
Supplement: Supplementary file 1 [file 26606798]

## Sheet: Sheet3
Table S7. Target mRNAs of both dMOV10 and the six "late" miRNAs
	The common mRNA targets of dMOV10 identified by TRIBE (Table S3) and 6 miRNAs that are upregulated at day-3 after Pe infection (Table S6) are listed.
	The potential target genes for the 6 miRNAs were obtained from TargetScanFly v7.2 (mir-1-3p, mir-34-5p, mir-314-5p, mir-996-3p and mir-1007-5p) or TargetScanFly v6.2 (mir-10404-5p).
mir-1-3p	mir-34-5p	mir-314-5p	mir-996-3p	mir-1007-5p	mir-10404-5p
AMPdeam	babo	Ac13E	Calx	Adar	bbx
apt	CG15309	babo	CG13124	Arp2	CG15211
bark	CG42240	bbx	CG13917	c12.2	CG5149
CG13760	Dap160	Bx	CG14408	cg	Cyp1
CG4928	Sap30	CCT6	CG43340	CG17493	Eip93F
CG7536		CG10082	GlcT-1	CG2543	Pdp1
Eip93F		CG13917	Kdm2	CG42240
par-6		CG14764	Zasp66	CG46319
VhaAC39-1		CG15210		CG4768
		CG15309		CkIIbeta
		CG15422		CNMa
		CG17493		crol
		CG17652		Dap160
		CG2182		Dg
		CG2794		e(r)
		CG30497		EndoGI
		CG32280		Epac
		CG3358		Gclc
		CG34417		goe
		CG3566		hfw
		CG42240		Inx2
		CG45093		l(1)G0289
		CG46319		Lk6
		CG4768		Marf
		CG6379		par-6
		CHES-1-like		Pfrx
		CkIIbeta		PMCA
		Clamp		Pp2B-14D
		crol		rut
		CtBP		Sdc
		Dap160		spir
		Dg		St3
		Eip93F		tai
		EndoGI		tral
		Gip		Ubqn
		Imp		Ubr1
		l(2)gl		waw
		Lk6
		MRP
		nonA
		par-6
		Pldn
		PMCA
		Rab35
		RhoGAP15B
		RhoGAP19D
		Rok
		schlank
		Sdc
		spir
		stas
		Tak1
		Traf-like
		Trh
		Ubqn
		waw
		Zasp66
